# Supplementary material for: Hyaluronate-Functionalized Graphene for Label-Free Electrochemical Cytosensing
Source: MDPI journal article supplement (doi:10.3390/mi9120669), 2018-12-18
Supplement: s1 [file s1]

**Table S1.** The advantages and disadvantages of functionalized graphene.

| Modified Electrode                                                                 | advantages                                                                                                                        | disadvantages                               | Reference |
|------------------------------------------------------------------------------------|-----------------------------------------------------------------------------------------------------------------------------------|---------------------------------------------|-----------|
| Polyaniline/Graphene                                                               | Detect Mycobacterium tuberculosis, DNA biosensor                                                                                  | Detection limit not very low                | [28]      |
| AgNPs in PANI and N-doped graphene                                                 | Detect miRNA-21 biomarker, high sensitivity                                                                                       | needs further clinical validation           | [29]      |
| holey graphene                                                                     | Nitrite sensor, high sensitivity, and a low detection limit                                                                       | Real sample not mentioned                   | [30]      |
| 3D graphene/Ni3N nanoparticles                                                     | detects glucose and H <sub>2</sub> O <sub>2</sub> with satisfactory selectivity, reproducibility and long-term storage stability. | Needs further electrocatalytic applications | [32]      |
| AuNPs/rGO/thionine (THI)                                                           | detect PSA as low as 10 pg mL <sup>-1</sup> , detection of clinical serum samples                                                 | Stable not mentioned                        | [33]      |
| folate decorated Nitrogen-doped graphene quantum                                   | detection of MKN 45, HT 29 and MCF 7 cancer cell                                                                                  | needs further clinical validation           | [34]      |
| Hollow nitrogen-doped carbon microspheres pyrolyzed from self-polymerized dopamine | simultaneous electrochemical determination of uric acid, ascorbic acid and dopamine                                               | Detection limit not very low                | [35]      |
| Hyaluronic acid-functionalized single-walled carbon nanotubes                      | tumor-targeting MRI contrast agent                                                                                                | needs further clinical validation           | [36]      |

**Table S2.** Fitting values of all elements in the Randle's equivalent circuit for the different electrodes.

|                                                         | R <sub>s</sub> (Ω) | R <sub>et</sub> (Ω) | C <sub>dl</sub> (nF) | Z <sub>w</sub> (μΩ/s <sup>1/2</sup> ) |
|---------------------------------------------------------|--------------------|---------------------|----------------------|---------------------------------------|
| GC                                                      | 65.3 ± 4.1         | 164 ± 6             | 427 ± 22             | 643 ± 36                              |
| HG/GC                                                   | 70.3 ± 3.9         | 1256 ± 48           | 469 ± 18             | 726 ± 43                              |
| HCT-116 (5.0 × 10 <sup>2</sup> cells·mL <sup>-1</sup> ) | 73.9 ± 3.6         | 2436 ± 89           | 484 ± 23             | 704 ± 41                              |
| HCT-116 (5.0 × 10 <sup>3</sup> cells·mL <sup>-1</sup> ) | 74.1 ± 3.5         | 2798 ± 92           | 476 ± 21             | 735 ± 30                              |
| HCT-116 (5.0 × 10 <sup>4</sup> cells·mL <sup>-1</sup> ) | 75.2 ± 3.8         | 3779 ± 108          | 457 ± 26             | 698 ± 32                              |
| HCT-116(5.0 × 10 <sup>5</sup> cells·mL <sup>-1</sup> )  | 74.7 ± 3.6         | 4769 ± 162          | 463 ± 24             | 734 ± 35                              |
| HCT-116 (5.0 × 10 <sup>6</sup> cells·mL <sup>-1</sup> ) | 76.8 ± 3.7         | 5482 ± 211          | 470 ± 28             | 651 ± 41                              |

**Table S3.** This work compared with other reports of detecting cancer cells.

| Method                                                                                       | Detected cells                                                  | Detection limit / the concentration range        | Reference |
|----------------------------------------------------------------------------------------------|-----------------------------------------------------------------|--------------------------------------------------|-----------|
| follic acid conjugation isocratic reversed-phase HPLC method                                 | rilpivirine (HeLa cells lysate)                                 | 0.025-2 ug·mL <sup>-1</sup>                      | [1]       |
| liquid chromatography-tandem mass spectrometry assay (LC-MS/MS) with electrospray ionization | HepG2                                                           | of 10.0 to 10,000 ng·mL <sup>-1</sup>            | [2]       |
| electrochemical                                                                              | Glutathione(HeLa cells)                                         | 1.0-500.0 u M                                    | [3]       |
| solid phase extraction (SPE)-UPLC-MS/MS method                                               | oroxylin A and oroxylin A 7-O-D-glucuronide (HepG2 cell lysate) | ~~                                               | [4]       |
| Carboxymethyl chitosan/graphene                                                              | HL-60 cells                                                     | 500                                              | [5]       |
| High Performance Liquid Chromatography Method                                                | 18-beta-Glycyrrhetic Acid in HepG2 Cell Line                    | 1.5-120 ug·mL <sup>-1</sup> (n = 5)              | [6]       |
| Chip-based monolithic microextraction combined with ICP-MS                                   | bismuth (HepG2 cells)                                           | the detection limit was 0.21 ng·mL <sup>-1</sup> | [7]       |
| fluorescent probes and subsequently separated by microchip electrophoresis                   | superoxide and hydrogen peroxide (human HepG2 cell extracts)    | ~~                                               | [8]       |
| capillary electrophoresis                                                                    | glutathione in single HepG2 cells                               | detection limit was 1 uM                         | [9]       |
| Hydrophilic interaction liquid chromatography-tandem mass spectrometry method                | intact oxaliplatin in cells                                     | 2-200 ng·mL <sup>-1</sup>                        | [10]      |

**Scratch test.**

A scratch test was performed to assess the mobility of HCT-116 cells. In brief, HCT-116 cells were incubated in a 6-well plate, and at least five horizontal lines were drawn on the back of the plate. Then,  $5 \times 10^5$  cells were placed in each well and cultured overnight. Straight scratches were then made vertical to the lines drawn on the back of the plate, and the wells were washed three times with PBS to remove excess cells. Cells were cultured with serum-free culture medium at 37 °C with 5% CO<sub>2</sub>, and observed at 0 h, 12h, 24 h, and 48 h.

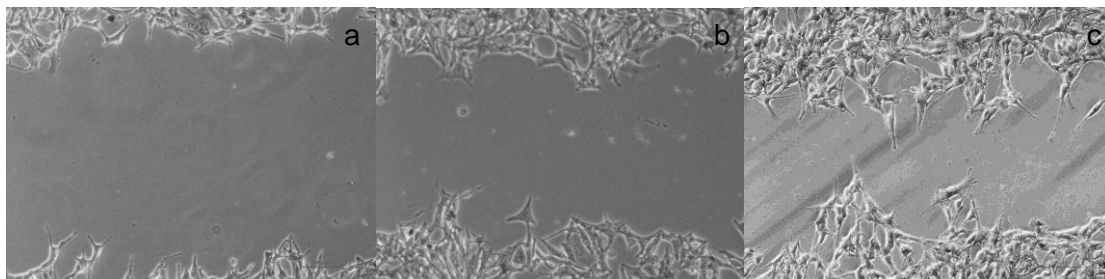

**Figure S1.** Cell scratch assays. Scratch between HCT-116 cells at (a) 0 h, (b) 24 h, and (c) 48 h. Scale bar 100  $\mu$ m.

#### The selectivity test and the control experiments.

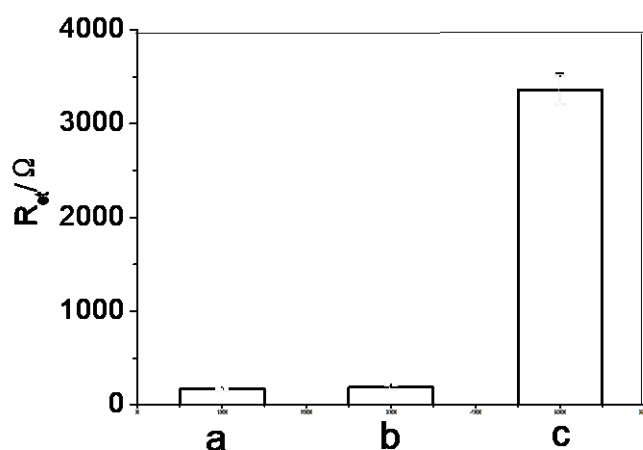

**Figure S2.**  $\Delta R_{et}$  response of the cytosensor: (a) bare GCE, (b) GCE incubated in  $1.0 \times 10^5$  cells·mL<sup>-1</sup> NIH/3T3 cells, and (c)  $1.0 \times 10^5$  cells·mL<sup>-1</sup> HCT-116 cells for 2 h, respectively. Error bars represent standard deviation. Every point was an average value of three models of the cytosensors for independent measurements.

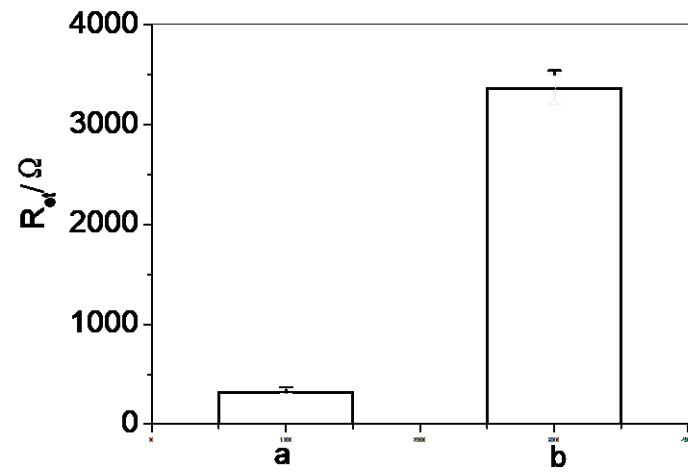

**Figure S3.**  $\Delta R_{et}$  response of (a) HG and (b)  $\text{NH}_2$  modified GCE with  $1.0 \times 10^5 \text{ cells}\cdot\text{mL}^{-1}$  HCT-116 cells. Error bars represent standard deviation. Every point was an average value of three models of the cytosensors for independent measurements.
